# Supplementary material for: Local Antibiotics in the Treatment of Diabetic Foot Infections: A Narrative Review
Source: MDPI journal article supplement (doi:10.3390/antibiotics12010124), 2023-01-09
Supplement: s1 [file antibiotics-2131881-supplementary.pdf › antibiotics-2131881-supplementary.pdf]

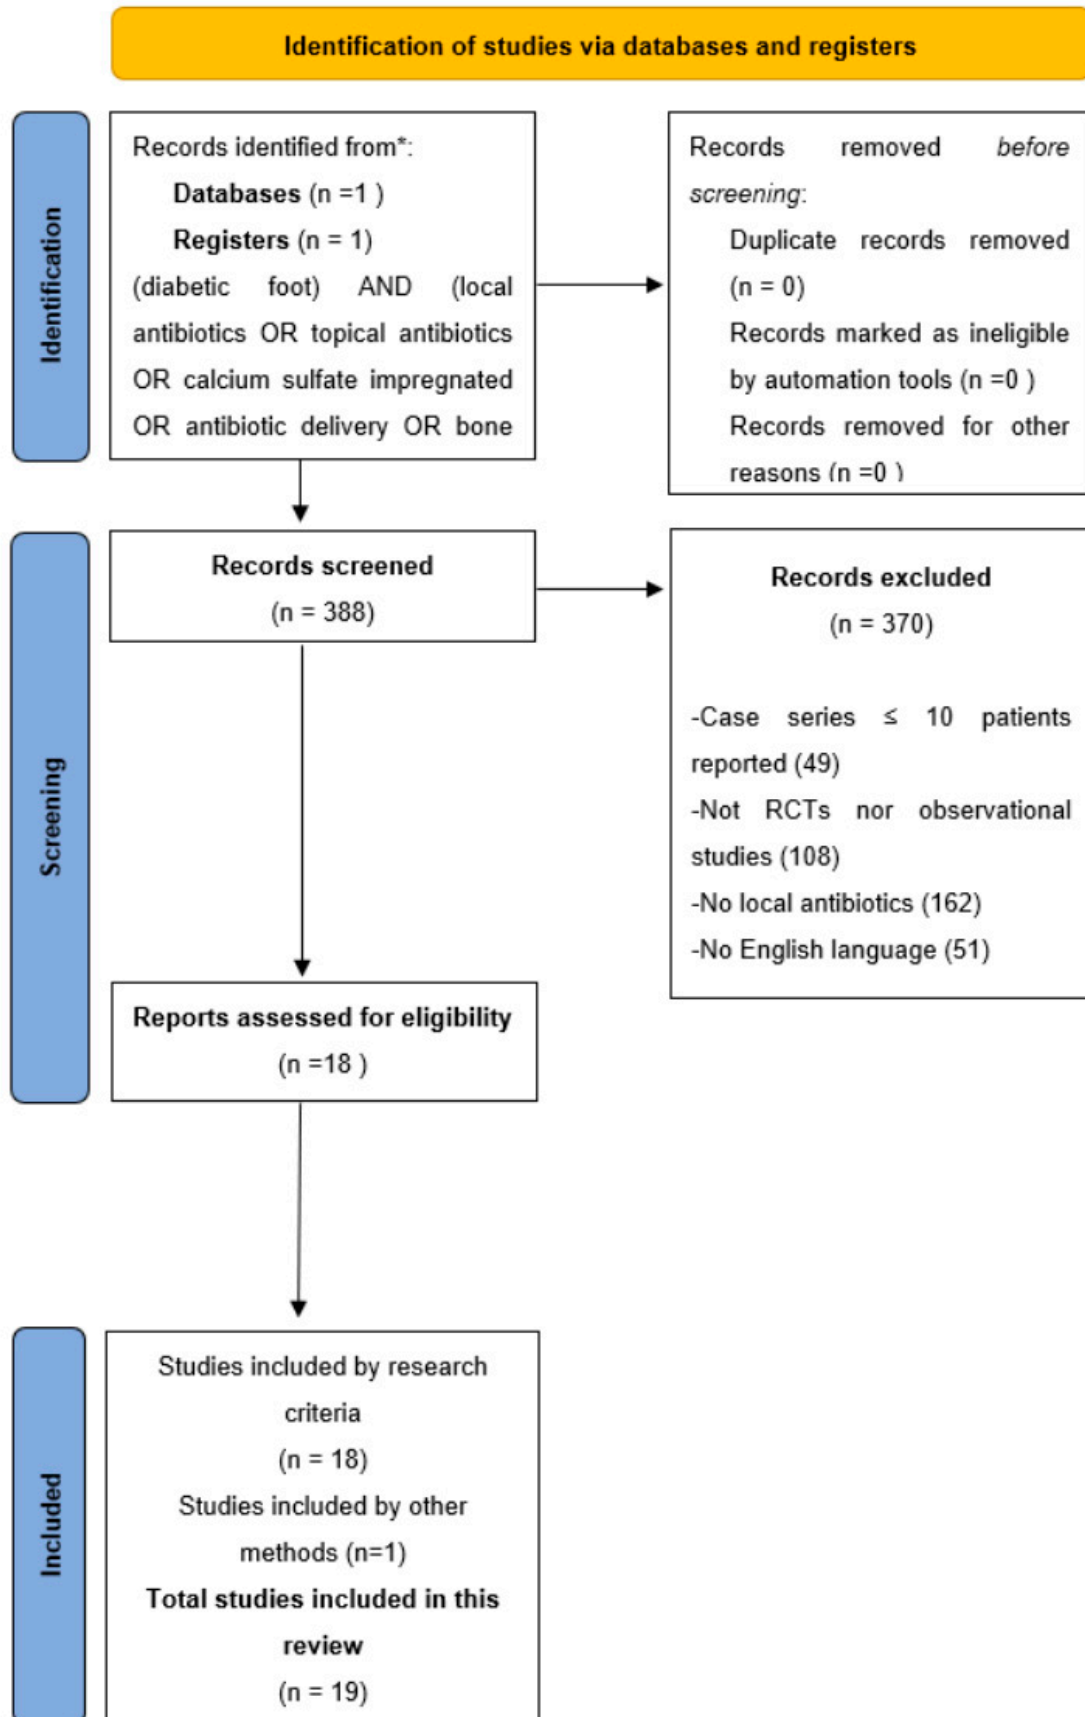

**Figure S1.** Flowchart of included studies.

**File S1.** Search strategy in PubMed

Concept 1: Diabetic patients with foot problems

1. 'diabetic foot' (15,598)

Concept 2: Topical and Local antibiotics

2. 'local antibiotics' (34,550)

3. 'topical antibiotics' (11,841)

4. 'calcium sulfate impregnated' (163)

5. 'antibiotic delivery' (21,765)

6. 'bone cement' (22,811)

7. #2 OR #3 OR #4 OR #5 OR #6 (84,641)

Concept 1 AND Concept 2

8. #1 AND #7 (388)
